# Supplementary material
Source: PubMed Central journal article supplement (PMC1634925)
Supplement: rspb20063496s02.pdf [file rspb20063496s02.pdf]

## Supplementary Information

Brady et al., Recent and simultaneous origins of eusociality in halictid bees

### Table 2

Taxa used in this study with DNA voucher codes (four letter abbreviation and number), subfamilial classification, locality data [and collector], and Genbank accession numbers for the three genes analyzed. For opsin, the sequences labeled with an asterisk (\*) include only the upstream portion of the gene (using primers opsin For to opsin Rev). All other sequences are complete (spanning the region between primers opsin For and opsin Rev4).

### Figure 3 and Table 3

Summary of results from phylogenetic and dating analyses. The figure is the tree resulting from Bayesian phylogenetic analysis (see text for details of analysis). For each numbered node, Table 3 lists: (1) the posterior value from this analysis; (2) parsimony bootstrap values; and (3) the mean, upper, and lower credibility intervals from Bayesian dating analysis using an *a priori* age of  $80 \pm 20$  mya for the root node.

| Taxon                                   | abbrev | no.    | Subfm | Locality data                                        | Opsin<br>(~1200bp) | Wingless<br>(450bp) | EF1<br>(~1600bp) |
|-----------------------------------------|--------|--------|-------|------------------------------------------------------|--------------------|---------------------|------------------|
| <i>Conanthalictus wilmattae</i>         | Cowi   | 351    | Ro    | USA: California [J. Neff]                            | AY227934           | AY222553            | AF435378         |
| <i>Dufourea malacothricis</i>           | Duma   | 235    | Ro    | USA: Michigan [P. Lincoln]                           | AY227917           | AY222554            | AF435382         |
| <i>Dufourea mulleri</i>                 | Dumu   | 233    | Ro    | USA: Michigan [P. Lincoln]                           | AY227918           | AY222555            | AF435383         |
| <i>Dufourea novaeangliae</i>            | Duno   | 354    | Ro    | USA: New York, Cayuga Co.                            | AY227919           | AY222556            | AF435384         |
| <i>Goeletapis peruensis</i>             | Gope   | 569    | Ro    | Peru: Lima Dept. [J.G. Rozen, Jr.]                   | AY227923*          | AY222560            | AF435386         |
| <i>Penapis moldenkei</i>                | Pnpe   | 572    | Ro    | Chile: Huasco Prov. [J.G. Rozen, Jr.]                | AY227921           | AY222558            | AF435401         |
| <i>Penapis toroi</i>                    | Pnto   | 586    | Ro    | Chile: Region III [L. Packer]                        | AY227922           | AY222559            | AF435402         |
| <i>Protodufourea parca</i>              | Pfsp   | 237    | Ro    | USA: Arizona, Pima Co. [L. Packer]                   | AY227920           | AY222557            | AF435399         |
| <i>Sphécodosoma pratti</i>              | Sspr   | 355    | Ro    | USA: Texas, Mason Co. [J. Neff]                      | AY227924           | AY222561            | AF435410         |
| <i>Systropha curvicornis</i>            | Sycu   | 350    | Ro    | Austria: Vienna [M. Ayasse]                          | AY227925           | AY222562            | AF435411         |
| <i>Systropha planidens</i>              | Sypl   | 349    | Ro    | Austria: Vienna [M. Ayasse]                          | AY227926           | AY222563            | AF435412         |
| <i>Xeralictus bicuspidariae</i>         | Xrbi   | 566    | Ro    | USA: California, San Diego Co. [R. Snelling]         | AY227927           | AY222564            | AF435413         |
| <i>Xeralictus timberlakei</i>           | Xrti   | 564    | Ro    | USA: California, Riverside Co. [R. Snelling]         | AY227928           | AY222565            | AF435414         |
| <i>Dieunomia nevadensis</i>             | None   | 207    | No    | USA: Arizona, Cochise Co.                            | AY227931           | AY222568            | AF435396         |
| <i>Dieunomia triangulifera</i>          | Notr   | 286    | No    | USA: Kansas, Douglas Co.                             | AY227932           | AY222569            | AF435397         |
| <i>Lipotriches (Austro.) australica</i> | Noau   | 754    | No    | Australia: South Australia, Cowell                   | AY227930           | AY222567            | AF435395         |
| <i>Pseudapis unidentata</i>             | Psun   | 241    | No    | Spain: Almería Prov.                                 | AY227933           | AY222570            | AF435404         |
| <i>Nomioides facilis</i>                | Nmsp   | 243    | Nm    | Spain: Granada Prov.                                 | AY227929           | AY222566            | AF435394         |
| <i>Agapostemon leunculus</i>            | Agle   | 336    | Hah   | Republic of Panama: Panama Prov. [W. Wcislo]         | AY227939           | AY222576            | AF435371         |
| <i>Agapostemon tyleri</i>               | Agty   | 230    | Hah   | USA: Arizona, Cochise Co.                            | AY227940           | AY222577            | AF140320         |
| <i>Caenohalictus sp. 2</i>              | Cnsp   | 578    | Hah   | Chile: Region I, Socoroma [L. Packer]                | AY227941           | AY222578            | AF435376         |
| <i>Caenohalictus sp. 3</i>              | Cnsp   | 788    | Hah   | Brazil: Minas Gerais [D. Yanega]                     | AY227942           | AY222579            | AF435377         |
| <i>Chaetolictus sp. 2</i>               | Chsp   | 603    | Hah   | South Africa: Kwazulu-Natal [L. Packer]              | AY227952           | AY222588            | AF435374         |
| <i>Dinagapostemon sp. 1</i>             | Dnsp   | 573    | Hah   | Republic of Panama: Chiriquí Prov. [L. Packer]       | AY227943           | AY222580            | AF435380         |
| <i>Dinagapostemon sp. 2</i>             | Dnsp   | 790    | Hah   | Republic of Panama: Coclé Prov. [L. Packer]          | AY227944           | AY222581            | AF435381         |
| <i>H. (Halictus) ligatus</i>            | Hali   | 62/345 | Hah   | USA: New York, Tompkins Co.                          | AY455895           | AY455899            | AF140299         |
| <i>H. (Halictus) quadricinctus</i>      | Haqu   | 89     | Hah   | France: Dordogne [C. Plateaux-Quenu]                 | AY227956           | AY222592            | AF140334         |
| <i>H. (Halictus) scabiosae</i>          | Hask   | 365    | Hah   | Spain: Granada Prov.                                 | AY455896           | AY455900            | AF140330         |
| <i>H. (Seladonia) kessleri</i>          | Hake   | 239    | Hah   | Austria: Vienna [M. Ayasse]                          | AY455894           | AY455898            | AF140306         |
| <i>H. (Seladonia) tripartitus</i>       | Hatr   | 93     | Hah   | USA: Arizona, Cochise Co.                            | AY227957           | AY222593            | AF140310         |
| <i>H. (Vestitolictus) vestitus</i>      | Veve   | 373    | Hah   | Spain: Granada Prov.                                 | AY227958*          | AY222594            | AF140313         |
| <i>Habralictus sp.</i>                  | Hasp   | 786    | Hah   | Brazil: Minas Gerais [D. Yanega]                     | AY227945           | AY222582            | AF435387         |
| <i>L. (Australictus) lithuscum</i>      | Auli   | 711    | Hah   | Australia: Victoria                                  | AY227962           | AY222598            | AF435372         |
| <i>L. (Chilalictus) florale</i>         | Chfl   | 320    | Hah   | Australia: South Australia [S. Reyes]                | AY227966           | AY222602            | AF264792         |
| <i>L. (Chilalictus) lanarium</i>        | Chla   | 316    | Hah   | Australia: Victoria [S. Reyes]                       | AY227967           | AY222603            | AF264793         |
| <i>L. (Dialictus) figheresi</i>         | Difi   | 341    | Hah   | Costa Rica: San José Province                        | AF448903           | AY455901            | AF264802         |
| <i>L. (Dialictus) zephyrum</i>          | Dizp   | 74     | Hah   | USA: New York, Seneca Co.                            | AF448918*          | AY222607            | AF435379         |
| <i>L. (Evyllaes) calceatum</i>          | Evca   | 105    | Hah   | France: Dordogne [C. Plateaux-Quenu]                 | AF448877*          | AY222608            | AF435385         |
| <i>L. (Evyllaes) malachurum</i>         | Evml   | 111    | Hah   | France: Dordogne [C. Plateaux-Quenu]                 | AF448890           | AY455903            | AF264826         |
| <i>L. (Evyllaes) marginatum</i>         | Evmg   | 108    | Hah   | France: Dordogne [C. Plateaux-Quenu]                 | AF448889           | AY455902            | AF264825         |
| <i>L. (Evyllaes) politum</i>            | Eupo   | 122    | Hah   | France: Dordogne [C. Plateaux-Quenu]                 | AF448895           | AY455904            | AF264831         |
| <i>L. (Hemhalictus) lustrans</i>        | Helu   | 186    | Hah   | USA: Texas, Bastrop Co. [J. Neff]                    | AF448904*          | AY222609            | AF435388         |
| <i>L. (Homalictus) megastigmus</i>      | Homg   | 360    | Hah   | Australia: Western Australia, Bluff Knoll [S. Reyes] | AY227964           | AY222600            | AF264839         |
| <i>L. (Homalictus) punctatus</i>        | Hopu   | 245    | Hah   | Australia: South Australia, Adelaide [S. Reyes]      | AY227965           | AY222601            | AF435389         |
| <i>L. (Lasioglossum) athabascense</i>   | Laat   | 556    | Hah   | USA: New York, Tompkins Co.                          | AF448867           | AY222604            | AF435390         |
| <i>L. (Lasioglossum) scitulum</i>       | Lasc   | 550    | Hah   | Japan, Shimane Prefecture [R. Miyanaga]              | AY227968           | AY222605            | AF435391         |
| <i>L. (Lasioglossum) zonulum</i>        | Lazo   | 284    | Hah   | USA: New York, Tompkins Co.                          | AY227969           | AY222606            | AF264855         |
| <i>L. (Parasphecodes) hybodinum</i>     | Pahy   | 299    | Hah   | Australia: South Australia [S. Reyes]                | AY227963           | AY222599            | AF264857         |
| <i>L. (Sphécodogastra) oenotherae</i>   | Stoe   | 54     | Hah   | USA: New York, Tompkins Co.                          | AF448906           | AY455905            | AF264860         |
| <i>Lomatalictus sp.</i>                 | Losp   | 604    | Hah   | South Africa: Gauteng [C. Eardley]                   | AY227953           | AY222589            | AF435393         |
| <i>Mexalictus arizonensis</i>           | Mxaz   | 98     | Hah   | USA: Arizona, Santa Cruz Co. [L. Packer]             | AY227959           | AY222595            | AF140322         |
| <i>Pachyalictus sp.</i>                 | Phsp   | 357    | Hah   | Vietnam: Ban Don [L. Packer]                         | AY227954           | AY222590            | AF435400         |
| <i>Pseudagapostemon brasiliensis</i>    | Psbr   | 347    | Hah   | Brazil: Minas Gerais [D. Yanega]                     | AY227946           | AY222583            | AF140323         |
| <i>Pseudagapostemon pissisi</i>         | Psps   | 576    | Hah   | Chile: Region VIII (nr. Temuco) [L. Packer]          | AY227947           | AY222584            | AF435403         |
| <i>Rhinotula denticrus</i>              | Rhdn   | 799    | Hah   | Republic of Panama: Panama Prov. [D. Roubik]         | AY227948           | AY222585            | AF435405         |
| <i>Ruizantheda mutabilis</i>            | Rumt   | 574    | Hah   | Chile: Region VIII (nr. Temuco) [L. Packer]          | AY227949           | AY222586            | AF435406         |
| <i>Ruizantheda proxima</i>              | Rupr   | 575    | Hah   | Chile: Region VIII (nr. Temuco) [L. Packer]          | AY227950           | AY222587            | AF435407         |
| <i>Sphécodes minor</i>                  | Spmi   | 21     | Hah   | USA: New York, Tompkins Co.                          | AY227960           | AY222596            | AF140324         |
| <i>Sphécodes ranunculi</i>              | Spra   | 337    | Hah   | Canada: Nova Scotia [L. Packer]                      | AY227961           | AY222597            | AF140325         |
| <i>Thrincohalictus prognathus</i>       | Thpr   | 434    | Hah   | Israel: Golan Heights [L. Packer]                    | AY227955           | AY222591            | AF140326         |
| <i>Augochlora (Augochlora) pura</i>     | Aupu   | 333    | Haa   | USA: New York, Tompkins Co.                          | AY455893           | AY455897            | AF140314         |
| <i>Augochlora pomoniella</i>            | Aupo   | 592    | Haa   | USA: California, Inyo Co. [J. Ascher]                | AY227935           | AY222572            | AF435373         |
| <i>Augochloropsis metallica</i>         | Aume   | 334/5  | Haa   | USA: New York, Tompkins Co.                          | AY227934           | AY222571            | AF140315         |
| <i>Corynura (Cory) patagonica</i>       | Copt   | 581    | Haa   | Chile: Region IX, near Temuco [L. Packer]            | AY227936           | AY222573            | na               |
| <i>Megalopta genalis</i>                | Mgge   | 247    | Haa   | Republic of Panama: Panama Prov. [M. Engel]          | AY227937           | AY222574            | AF140316         |
| <i>Neocorynura discolor</i>             | Ncdi   | 249    | Haa   | Colombia [M. Engel]                                  | AY227938           | AY222575            | AF140317         |

Fig. 3

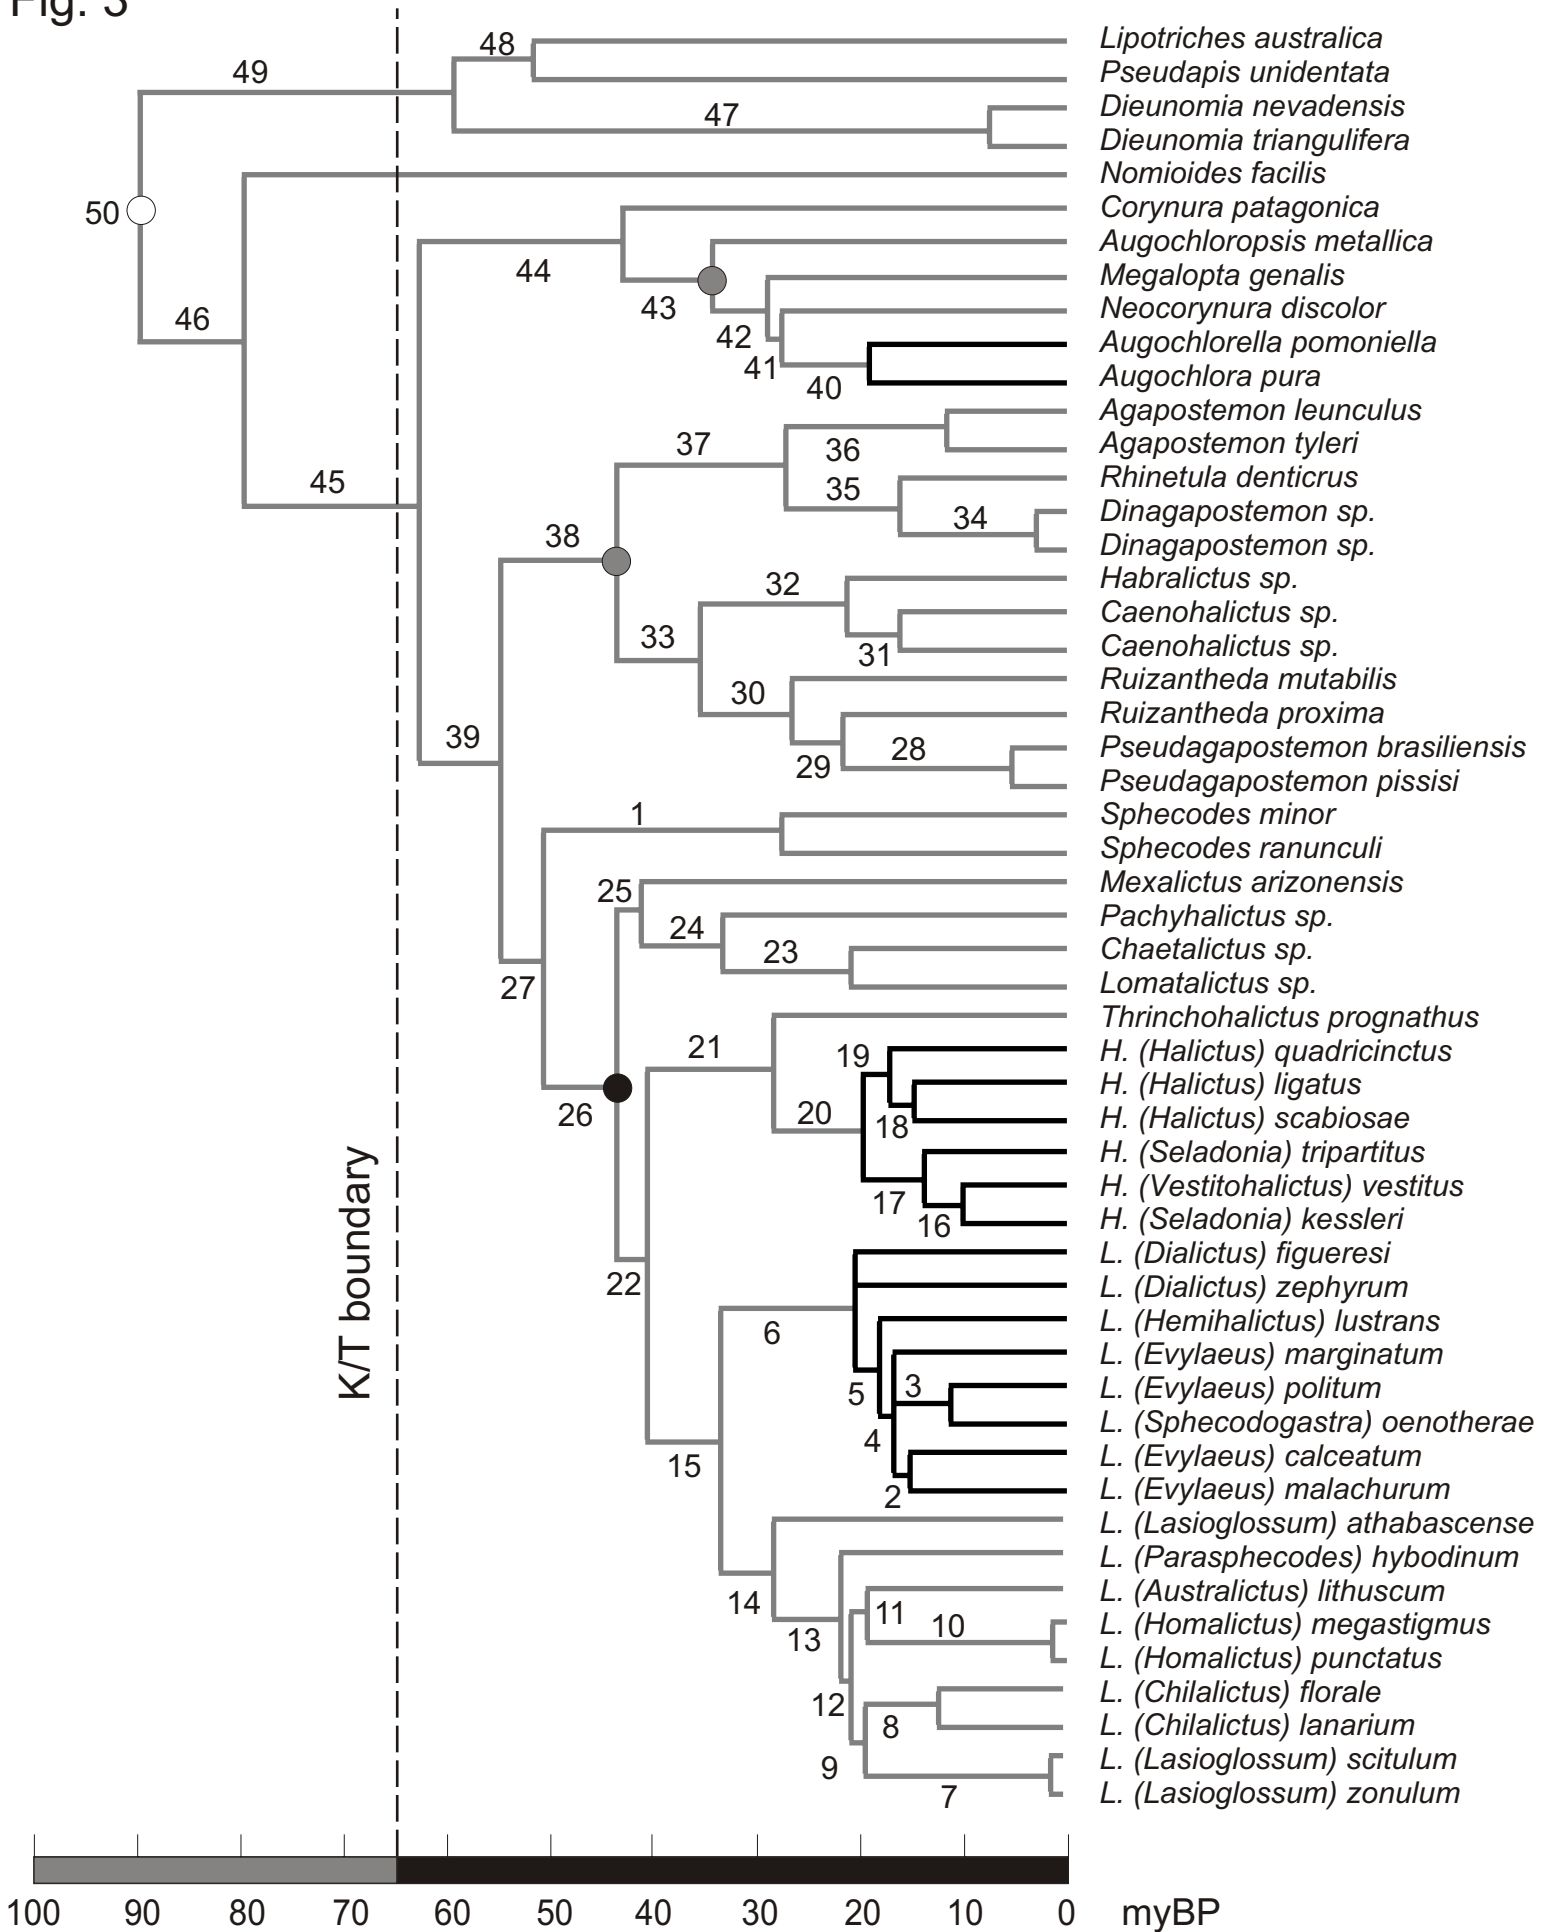

| NODE | BAYES PP | BOOTSTRAP | MEAN AGE | LOWER | UPPER | Taxon                        |
|------|----------|-----------|----------|-------|-------|------------------------------|
| 1    | 100      | 100       | 29       | 20    | 40    |                              |
| 2    | 80       | <50       | 16       | 11    | 22    |                              |
| 3    | 100      | 97        | 12       | 7     | 18    |                              |
| 4    | 68       | <50       | 17       | 12    | 24    |                              |
| 5    | 56       | <50       | 19       | 13    | 26    |                              |
| 6    | 100      | 100       | 22       | 15    | 29    | eusocial <i>Lasioglossum</i> |
| 7    | 100      | 100       | 2        | 0     | 4     |                              |
| 8    | 100      | 100       | 13       | 8     | 19    |                              |
| 9    | 100      | 70        | 20       | 15    | 28    |                              |
| 10   | 100      | 100       | 1        | 0     | 3     |                              |
| 11   | 100      | 77        | 20       | 15    | 27    |                              |
| 12   | 100      | 61        | 22       | 16    | 29    |                              |
| 13   | 100      | 96        | 23       | 17    | 30    |                              |
| 14   | 100      | 84        | 30       | 24    | 38    |                              |
| 15   | 100      | 100       | 35       | 29    | 44    |                              |
| 16   | 100      | 98        | 10       | 6     | 17    |                              |
| 17   | 100      | 100       | 14       | 9     | 22    |                              |
| 18   | 100      | 73        | 16       | 10    | 22    |                              |
| 19   | 100      | 90        | 18       | 12    | 25    |                              |
| 20   | 100      | 100       | 21       | 15    | 28    | <i>Halictus</i>              |
| 21   | 100      | 100       | 30       | 23    | 38    |                              |
| 22   | 100      | 75        | 43       | 38    | 51    |                              |
| 23   | 100      | 100       | 22       | 15    | 31    |                              |
| 24   | 100      | 97        | 35       | 28    | 44    |                              |
| 25   | 100      | 60        | 43       | 38    | 52    |                              |
| 26   | 100      | 100       | 46       | 42    | 54    |                              |
| 27   | 100      | 86        | 53       | 46    | 63    |                              |
| 28   | 100      | 100       | 5        | 2     | 11    |                              |
| 29   | 100      | 84        | 22       | 15    | 32    |                              |
| 30   | 100      | 96        | 27       | 19    | 37    |                              |
| 31   | 100      | 97        | 17       | 10    | 25    |                              |
| 32   | 100      | 100       | 22       | 14    | 31    |                              |
| 33   | 100      | 100       | 37       | 28    | 47    |                              |
| 34   | 100      | 100       | 3        | 0     | 7     |                              |
| 35   | 100      | 100       | 17       | 10    | 25    |                              |
| 36   | 100      | 100       | 12       | 6     | 20    |                              |
| 37   | 100      | 100       | 28       | 19    | 39    |                              |
| 38   | 100      | 100       | 45       | 36    | 56    |                              |
| 39   | 100      | 99        | 57       | 49    | 67    |                              |
| 40   | 100      | 100       | 20       | 12    | 29    | eusocial Augochlorini        |
| 41   | 68       | <50       | 28       | 20    | 39    |                              |
| 42   | 100      | 82        | 30       | 21    | 41    |                              |
| 43   | 100      | 77        | 35       | 25    | 48    |                              |
| 44   | 100      | 100       | 44       | 32    | 59    |                              |
| 45   | 100      | 100       | 64       | 54    | 76    |                              |
| 46   | 100      | 86        | 80       | 67    | 95    |                              |
| 47   | 100      | 100       | 7        | 2     | 16    |                              |
| 48   | 100      | 86        | 51       | 37    | 66    |                              |
| 49   | 100      | 100       | 59       | 45    | 74    |                              |
| 50   | 100      | 100       | 89       | 76    | 105   |                              |
